# Supplementary material for: Fine-tuning the chemical state and acidity of ceria incorporated in hierarchical zeolites for ethanol dehydration
Source: Royal Society of Chemistry journal article supplement (doi:10.1039/d0cc04886k), 2020-01-01
Supplement: d0cc04886k1.pdf [file d0cc04886k1.pdf]

## Supplementary information

# **Fine-tuning the chemical state and acidity of ceria incorporated in hierarchical zeolites for ethanol dehydration**

Marisa Ketkaew,<sup>a</sup> Sorasak Klinyod,<sup>a</sup> Kachaporn Saenluang,<sup>a</sup> Chadatip Rodaum,<sup>a</sup> Anawat Thivasasith,<sup>a</sup> Pinit Kidkhunthod<sup>b</sup> and Chularat Wattanakit<sup>\*a</sup>

<sup>a</sup> Department of Chemical and Biomolecular Engineering, School of Energy Science and Engineering, Vidyasirimedhi Institute of Science and Technology, Rayong, 21210, Thailand

<sup>b</sup> Synchrotron Light Research Institute (Public Organization), 111 University Avenue, Muang District, Nakhon Ratchasima, 30000 Thailand

<sup>\*</sup>Corresponding author: E-mail: [chularat.w@vistec.ac.th](mailto:chularat.w@vistec.ac.th) (C. Wattanakit)

## Materials

All chemicals were of analytical grade and used as received without further purification. Aluminium isopropoxide (Sigma-Aldrich,  $\geq 98.0\%$ ), tetraethyl orthosilicate (TEOS, Sigma-Aldrich,  $\geq 99.0\%$ ), sodium hydroxide (NaOH, Carlo Erba,  $\geq 98.0\%$ ) were used as aluminium source, silica source, and mineralizing agent, respectively. Tetrapropylammonium hydroxide (TPAOH, 1.0 M in  $\text{H}_2\text{O}$ ) and tetrabutylphosphonium hydroxide (TBPOH, Sigma-Aldrich, 40% in  $\text{H}_2\text{O}$ ) were used as structure-directing agents (SDAs) for conventional zeolites and hierarchical zeolites, respectively. Cerium (III) acetate (TCI,  $>98.0\%$ ) was used as a precursor for cerium oxide. To study the catalytic activity, ethyl alcohol (Sigma-Aldrich,  $\geq 99.0\%$ ) was used as a reactant.

## Catalyst preparation

### *Synthesis of conventional ZSM-5 zeolite (ZSM5-CON)[1]*

The conventional ZSM-5 zeolite was synthesized with the molar composition of  $10\text{SiO}_2$ :  $0.05\text{Al}_2\text{O}_3$ :  $1\text{TPAOH}$ :  $1.03\text{NaOH}$ :  $400\text{H}_2\text{O}$ . After mixing TEOS (7 g) and TPAOH (3.42 g) as a silica-SDA solution, the sodium hydroxide (0.14 g) mixed with DI-water was slowly added into the silica-SDA solution, and it was then stirred at room temperature for 2 hours. After the aging process, the obtained gel was transferred to the lined hydrothermal synthesis reactor and heated to  $180\text{ }^\circ\text{C}$  for 3 days. After that, the prepared sample was washed with DI-water, filtered and dried at  $110\text{ }^\circ\text{C}$ . Finally, the ZSM5-CON was calcined at  $650\text{ }^\circ\text{C}$  for 6 hours to remove SDA.

### *Synthesis of hierarchical Silicalite-1 (Silicalite1-HIE) and ZSM-5 zeolites (ZSM5-HIE)[1]*

The hierarchical Silicalite-1 and ZSM-5 with different Si/Al ratios were synthesized with the molar composition of  $60\text{SiO}_2$ :  $x\text{Al}_2\text{O}_3$ :  $18\text{TBPOH}$ :  $0.75\text{NaOH}$ :  $600\text{H}_2\text{O}$ , where  $x$  was 0 and 0.3, denoted as Silicalite1-HIE and ZSM5-HIE, respectively. Firstly, TEOS, and aluminium isopropoxide were mixed together to prepare as a silica-alumina solution. The second solution containing TBPOH (8.62 g), sodium hydroxide (0.02 g) and DI-water was slowly added into a silica-alumina solution, then stirred at room temperature for 12 hours. After the aging process, the obtained gel was transferred to the lined hydrothermal synthesis reactor and heated to  $130\text{ }^\circ\text{C}$  for 2 days. After that, the prepared sample was washed with DI-water, filtered and dried at  $110\text{ }^\circ\text{C}$ . Finally, the Silicalite1-HIE and ZSM5-HIE zeolite were calcined at  $650\text{ }^\circ\text{C}$  for 6 hours to remove SDA.

### *Preparation of ceria supported on zeolites using ion-exchange method (Exc)*

The prepared zeolites were mixed with the desired amount of cerium (III) acetate and DI-water at  $80\text{ }^\circ\text{C}$  for 2 hours, and then filtered and washed with DI water, finally dried at  $100\text{ }^\circ\text{C}$

overnight. The prepared catalysts were calcined at 550 °C for 4 hours denoted as yCe(Exc)-ZSM5-HIE, and yCe(Exc)-ZSM5-CON for the hierarchical ZSM-5 and the conventional ZSM-5, respectively (y = 0, 1, 5, 10 and 20 wt% of CeO<sub>2</sub>).

#### *Preparation of ceria supported on zeolites using impregnation method (Imp)*

The synthesized zeolites were mixed with the desired amount of cerium (III) acetate and DI-water at room temperature for 24 hours using an impregnation method. Subsequently, the solvent was evaporated by rotary evaporator, and the obtained materials were finally dried at 100 °C overnight. The prepared catalysts were calcined at 550 °C for 4 hours, denoted as yCe(Imp)-Silicalite1-HIE, yCe(Imp)-ZSM5-HIE for the hierarchical silicalite-1, and the hierarchical ZSM-5, respectively (y = 5 wt% of CeO<sub>2</sub>).

It should be noted that all samples are denoted as yCe(*M*)-zeolite supports, where y is the CeO<sub>2</sub> content. *M* refers to the preparation method (Exc = ion-exchange method; Imp = impregnation method).

### **Characterization**

The powder X-ray diffraction (XRD) patterns of the prepared catalysts were investigated using Bruker D8 ADVANCE instrument with CuK $\alpha$  radiation (40 kV, 40 mA) in the 2 $\theta$  range of 5 ° to 60 ° with the step size of 0.02° and the scan rate of 1° min<sup>-1</sup>.

To study the morphology of the catalysts, scanning electron microscopy (SEM) images and transmission electron microscopy (TEM) images were obtained from JEOL JSM-7610F microscope, and JEOL JEM-ARM200F microscope at 200 kV, respectively.

The textural properties of all the prepared catalysts were determined by a N<sub>2</sub> adsorption-desorption measurement at -196 °C operated on a MicrotracBEL, BELSORP-max model, and all the prepared samples were degassed at 350 °C for 24 hours before the measurement. The specific surface area (SBET), micropore surface area and pore volume were calculated by the Brunauer–Emmett–Teller (BET) method, and *t*-plot method, respectively.

The elemental analysis was studied by using wavelength-dispersive X-ray fluorescence spectrometer (WDXRF) performed on Bruker S8 TIGER ECO instrument and scanning electron microscope and energy dispersive X-ray spectrometer (SEM-EDS) obtained from JEOL JSM-7610F microscope.

The surface properties were investigated including acidity performed by NH<sub>3</sub> temperature programmed desorption (NH<sub>3</sub>-TPD), basicity performed by CO<sub>2</sub> temperature programmed desorption (CO<sub>2</sub>-TPD), and reducibility performed by H<sub>2</sub> temperature programmed reduction

(H<sub>2</sub>-TPR). The measurements were conducted using a BELCAT II instrument equipped with thermal conductivity detectors (TCD). Prior to the NH<sub>3</sub>-TPD and CO<sub>2</sub>-TPD measurements, the samples (0.05 g) were pre-treated typically at 300 °C for 1 hour under the flow of He to completely remove molecules adsorbed on the samples, and then cooled down to 100 °C, together with saturated in the gas mixture of NH<sub>3</sub> gas (5 vol% in He) or CO<sub>2</sub> gas for 30 min (50 mL min<sup>-1</sup>), and flushed with He flow (50 mL min<sup>-1</sup>) for 30 min at 100 °C. The desorption steps of both techniques were recorded from 100 to 800 °C with the heating rate of 10 °C.min<sup>-1</sup>. In case of H<sub>2</sub>-TPR, the samples were pre-treated typically at 300 °C for 1 hour with the heating rate of 10 °C min<sup>-1</sup> under the flow of Ar and then cooled down to 50 °C. After that, the measurement was performed from 50 °C to 900 °C with the heating rate of 5°C min<sup>-1</sup> in a flow of 2 v/v% of H<sub>2</sub> in Ar (50 mL min<sup>-1</sup>).

The oxidation state of Ce was carefully characterized by using X-ray absorption near-edge structure (XANES) and all samples were pre-treated typically at 350 °C for 2 hours under the flow of N<sub>2</sub> to remove molecules adsorbed on the samples. The Ce L3-edge XANES spectra were obtained in transmission mode at the BL5.2 station at Siam Photon Laboratory (Synchrotron Light Research Institute (Public Organization), SLRI), Thailand.

### Catalytic activity test

The catalytic performance in ethanol dehydration was obtained using a fixed-bed reactor. Firstly, the prepared catalysts (0.1 g) were pretreated at 350 °C under the flow of N<sub>2</sub> (5 mL.min<sup>-1</sup>) for 2 hours. Then, the reaction was performed under N<sub>2</sub> flow at 350 °C with the WHSV<sub>EtOH</sub> of 5 h<sup>-1</sup>. The quantification of products was analyzed by a gas chromatograph (GC, Agilent 7890B) equipped with a flame ionization detector (FID) and PoraBOND Q capillary column (25 m x 0.32 mm) at a certain time interval of 1 hour. Subsequently, the conversion of ethanol (X<sub>EtOH</sub>) and the product selectivity (S<sub>i</sub>) were estimated by following equation:

$$X_{EtOH} = \left( \frac{(n_{EtOH})_0 - (n_{EtOH})_t}{(n_{EtOH})_t} \right) \times 100\%$$

$$S_i = \left( \frac{n_i}{(\sum n)_t} \right)$$

Where (n<sub>EtOH</sub>)<sub>0</sub>, (n<sub>EtOH</sub>)<sub>t</sub>, n<sub>i</sub>, Σn are the initial number of moles of ethanol, the number of moles of ethanol at a certain time, the number of moles of the desired product i, and the total number of moles of all the products, respectively.

### Reference

[1] Wannapakdee, W., Yutthalekha, T., Dugkhuntod, P., Rodponthukwaji, K., Thivasasith, A., Nokbin, S., ... & Wattanakit, C. (2019). Dehydrogenation of propane to propylene using promoter-free hierarchical Pt/Silicalite-1 nanosheets. *Catalysts*, 9(2), 174.

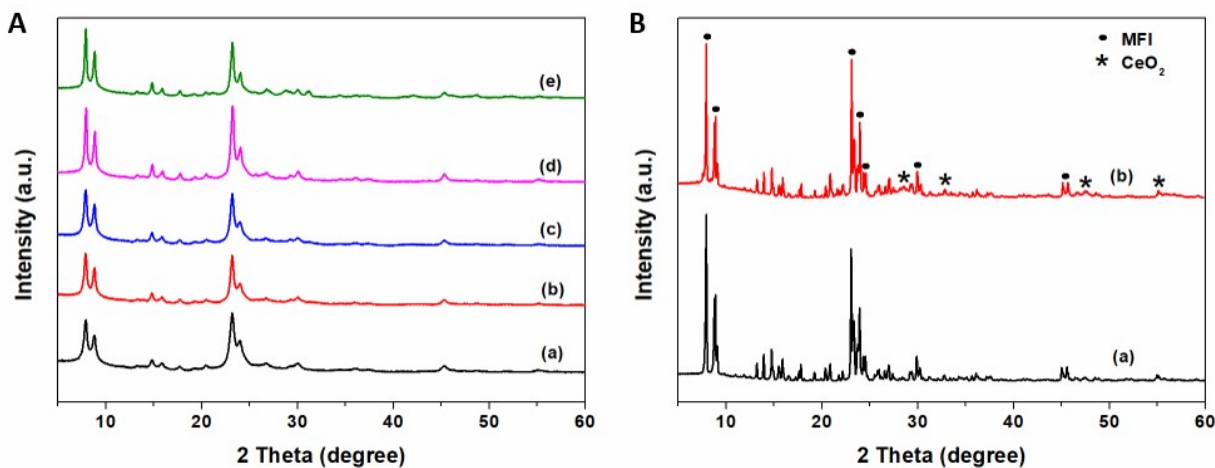

**Fig. S1** XRD patterns of (A) hierarchical zeolite supports: (a) ZSM5-HIE, (b) 5Ce(Imp)-ZSM5-HIE, (c) 5Ce(Exc)-ZSM5-HIE, (d) Silicalite1-HIE, and (e) 5Ce(Imp)-Silicalite1-HIE, and (B) conventional zeolite supports: (a) ZSM5-CON and (b) 5Ce(Exc)-ZSM5-CON.

**Table S1** Relative crystallinity of all the prepared catalysts.

| Tag   | Catalyst                 | Relative crystallinity (%) <sup>*</sup> |
|-------|--------------------------|-----------------------------------------|
| A-(a) | ZSM5-HIE                 | 100.0                                   |
| A-(b) | 5Ce(Imp)-ZSM5-HIE        | 91.2                                    |
| A-(c) | 5Ce(Exc)-ZSM5-HIE        | 95.4                                    |
| A-(d) | Silicalite1-HIE          | 100.0                                   |
| A-(e) | 5Ce(Imp)-Silicalite1-HIE | 95.2                                    |
| B-(a) | ZSM5-CON                 | 100.0                                   |
| B-(b) | 5Ce(Exc)-ZSM5-CON        | 87.2                                    |

<sup>\*</sup> The relative crystallinity of all the prepared catalysts before and after CeO<sub>2</sub> modification calculated by using the integrated data of the three most intense peaks at Theta (2θ) of 7.8°, 8.9° and 23.2°. The sample before CeO<sub>2</sub> modification was used as the reference to calculate the relative crystallinity of the CeO<sub>2</sub> samples.

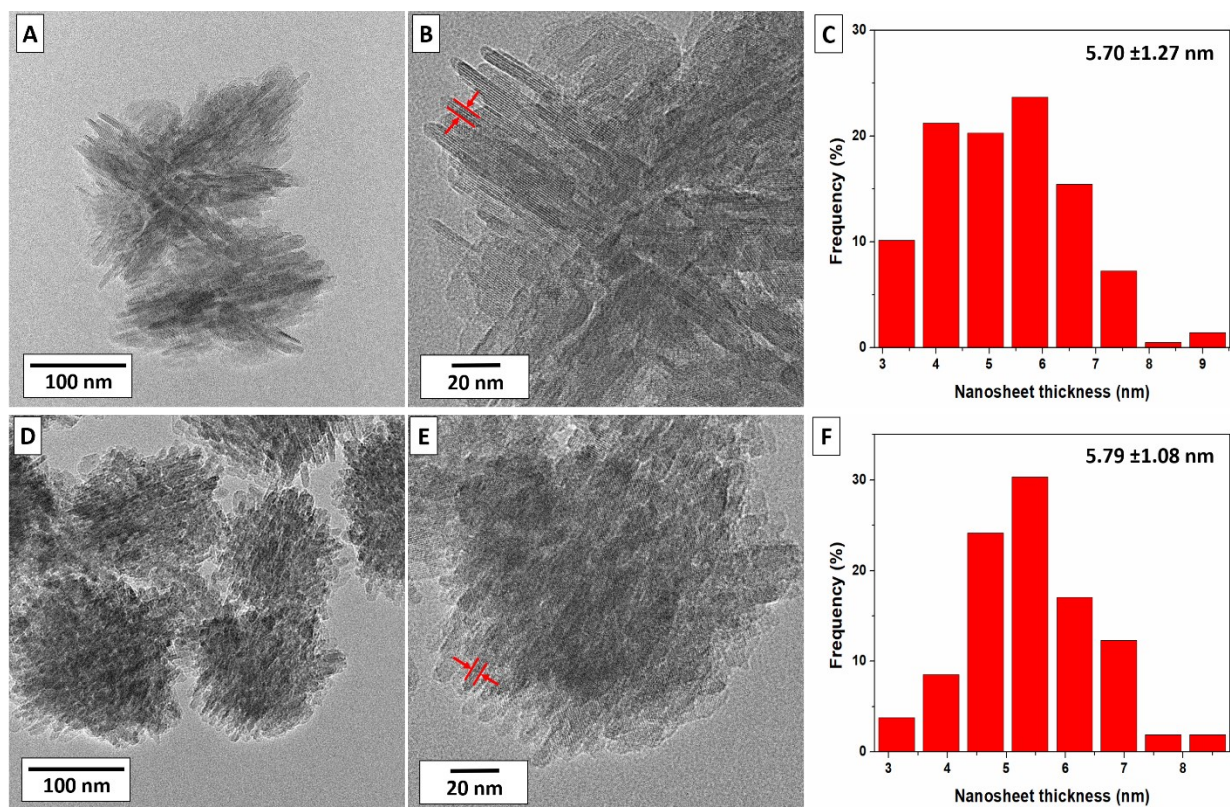

**Fig. S2** TEM images and nanosheet thickness distribution of (A-C) Silicalite1-HIE and (D-F) ZSM5- HIE.

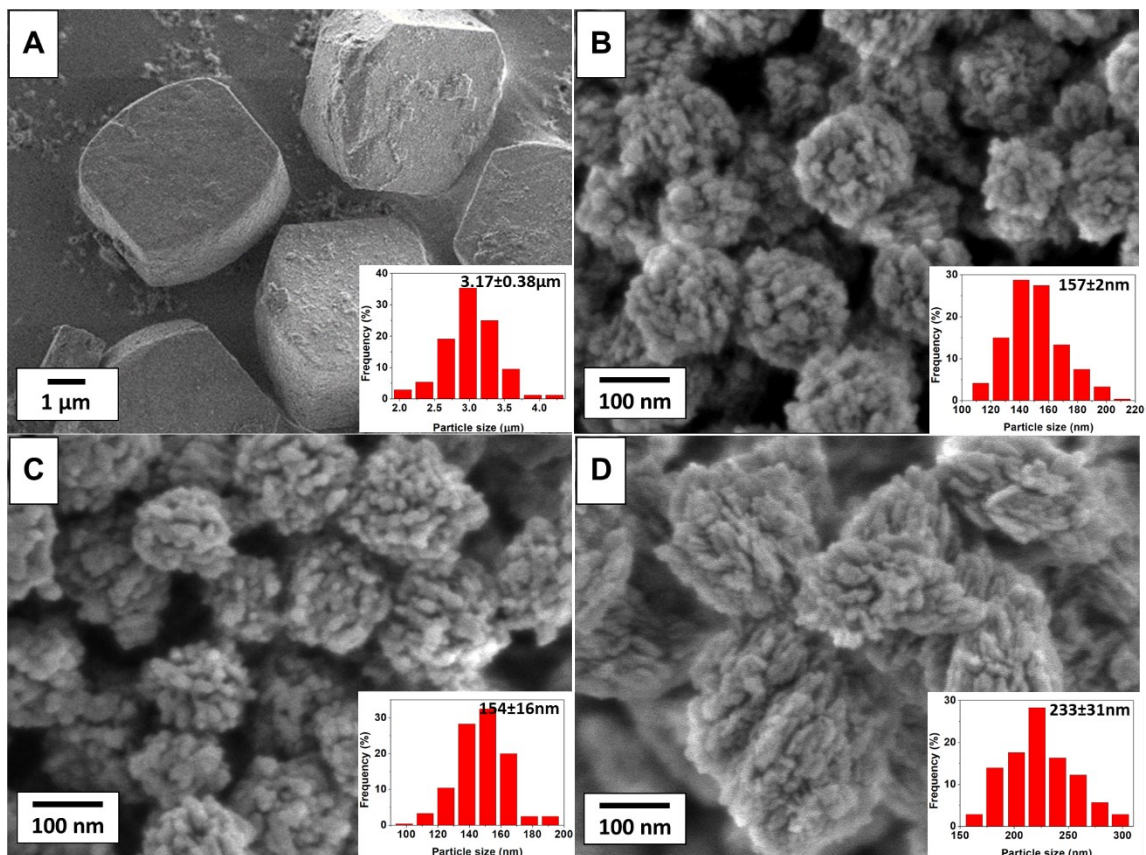

**Fig. S3** SEM images and zeolite particle size distribution of (A) 5Ce(Exc)-ZSM5-CON, (B) 5Ce(Exc)-ZSM5-HIE, (C) 5Ce(Imp)-ZSM5-HIE and (D) 5Ce(Imp)-Silicalite1-HIE.



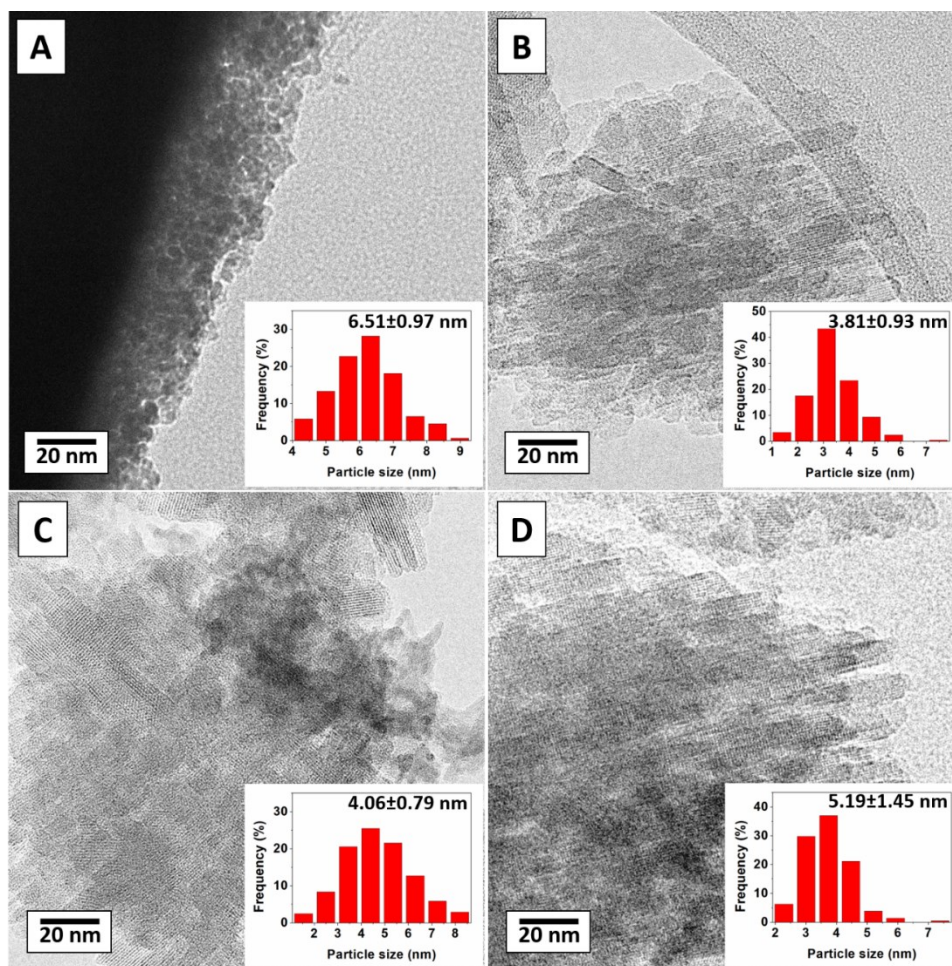

**Fig. S4** TEM images and CeO<sub>x</sub> particle size distribution of (A) 5Ce(Exc)-ZSM5-CON, (B) 5Ce(Exc)-ZSM5-HIE, (C) 5Ce(Imp)-ZSM5-HIE, and (D) 5Ce(Imp)-Silicalite1-HIE.



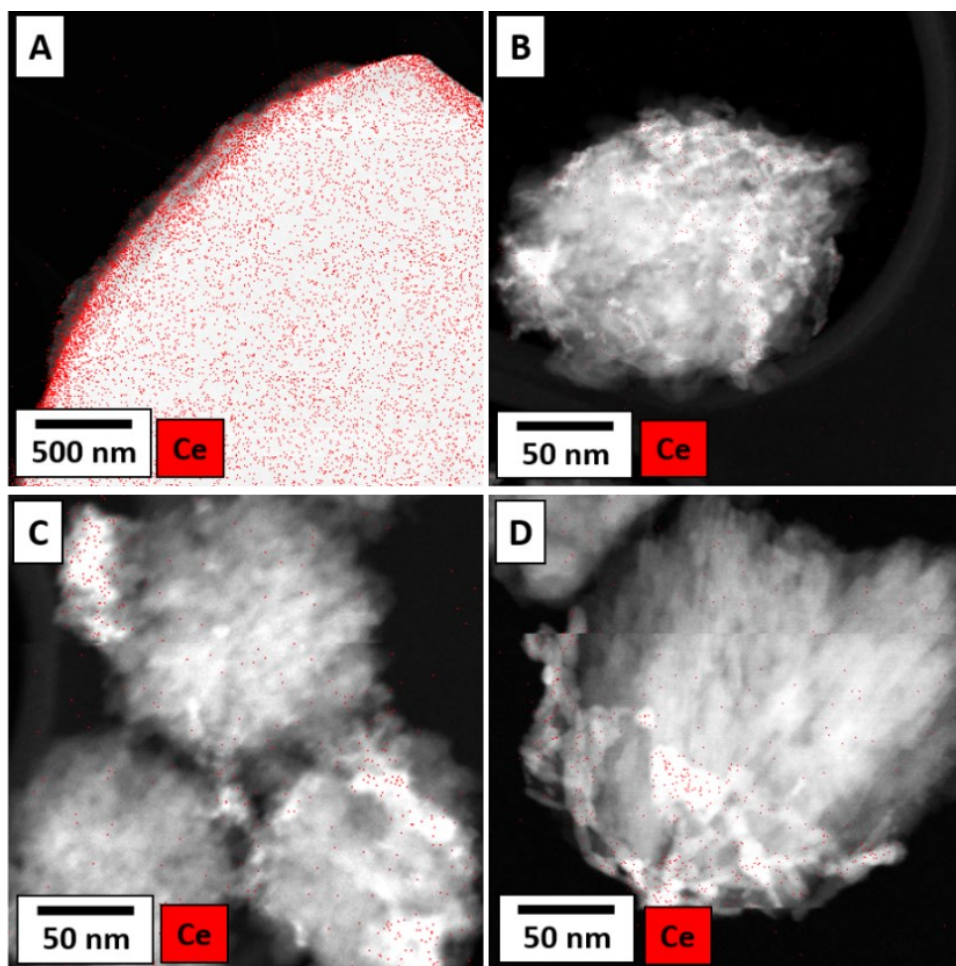

**Fig. S5** STEM-EDS images of (A) 5Ce(Exc)-ZSM5-CON, (B) 5Ce(Exc)-ZSM5-HIE, (C) 5Ce(Imp)-ZSM5-HIE and (D) 5Ce(Imp)-Silicalite1-HIE.

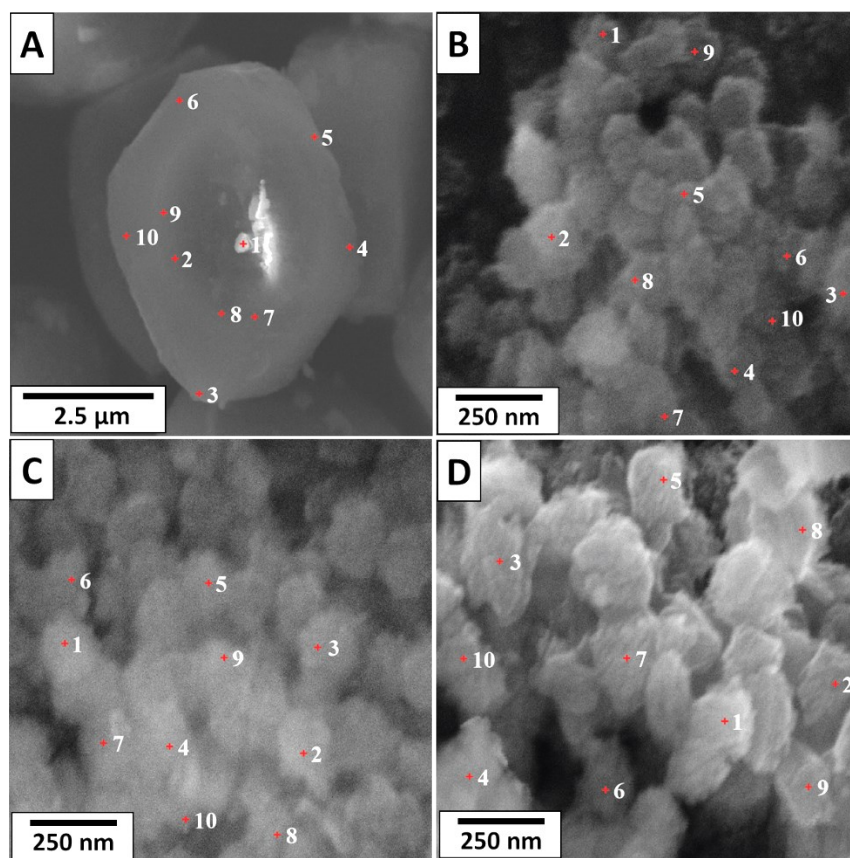

**Fig. S6** SEM-EDS elemental points analysis of (A) 5Ce(Exc)-ZSM5-CON, (B) 5Ce(Exc)-ZSM5-HIE, (C) 5Ce(Imp)-ZSM5-HIE and (D) 5Ce(Imp)-Silicalite1-HIE.

**Table S2** Elemental points analysis

| Point   | Ce/Si ratio       |                   |                          |                   |
|---------|-------------------|-------------------|--------------------------|-------------------|
|         | 5Ce(Exc)-ZSM5-HIE | 5Ce(Exc)-ZSM5-CON | 5Ce(Imp)-Silicalite1-HIE | 5Ce(Imp)-ZSM5-HIE |
| 1       | 1.24              | 7.18              | 8.59                     | 6.57              |
| 2       | 1.39              | 10.39             | 8.65                     | 8.56              |
| 3       | 1.05              | 22.70             | 8.16                     | 5.99              |
| 4       | 1.67              | 7.45              | 8.46                     | 7.74              |
| 5       | 1.11              | 13.58             | 4.77                     | 5.90              |
| 6       | 0.78              | 16.02             | 7.93                     | 5.76              |
| 7       | 0.89              | 14.69             | 9.76                     | 6.48              |
| 8       | 1.80              | 10.87             | 9.02                     | 8.91              |
| 9       | 0.78              | 15.20             | 7.12                     | 8.86              |
| 10      | 1.45              | 24.56             | 9.05                     | 7.83              |
| Average | 1.22 ±0.36        | 14.26 ±5.82       | 8.15 ±1.39               | 7.26 ±1.26        |

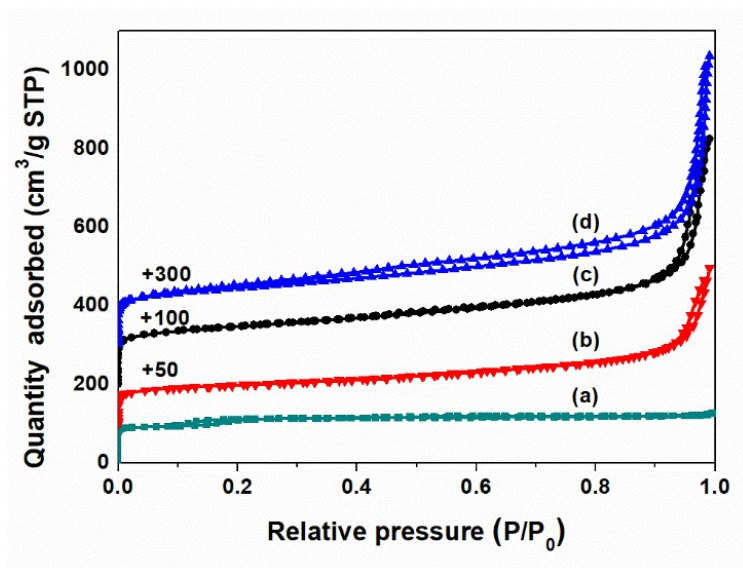

**Fig. S7** N<sub>2</sub> adsorption/desorption isotherms of (a) 5Ce(Exc)-ZSM5-CON, (b) 5Ce(Exc)-ZSM5-HIE, (c) 5Ce(Exc)-ZSM5-HIE, and (d) 5Ce(Imp)-Silicalite1-HIE.

**Table S3** Textural properties of all the prepared catalysts

| Catalysts                | Si/Al <sup>a</sup> | S <sub>BET</sub> <sup>b</sup><br>(m <sup>2</sup> g <sup>-1</sup> ) | S <sub>ext</sub> <sup>c</sup><br>(m <sup>2</sup> g <sup>-1</sup> ) | S <sub>micro</sub> <sup>d</sup><br>(m <sup>2</sup> g <sup>-1</sup> ) | V <sub>total</sub> <sup>e</sup><br>(cm <sup>3</sup> g <sup>-1</sup> ) | V <sub>micro</sub> <sup>f</sup><br>(cm <sup>3</sup> g <sup>-1</sup> ) | V <sub>ext</sub> <sup>g</sup><br>(cm <sup>3</sup> g <sup>-1</sup> ) |
|--------------------------|--------------------|--------------------------------------------------------------------|--------------------------------------------------------------------|----------------------------------------------------------------------|-----------------------------------------------------------------------|-----------------------------------------------------------------------|---------------------------------------------------------------------|
| 5Ce(Exc)-ZSM5-HIE        | 60.7               | 464                                                                | 206                                                                | 258                                                                  | 0.956                                                                 | 0.147                                                                 | 0.809                                                               |
| 5Ce(Exc)-ZSM5-CON        | 97.6               | 383                                                                | 5                                                                  | 378                                                                  | 0.191                                                                 | 0.177                                                                 | 0.014                                                               |
| 5Ce(Exc)-ZSM5-HIE        | 58.4               | 356                                                                | 139                                                                | 217                                                                  | 0.604                                                                 | 0.104                                                                 | 0.500                                                               |
| 5Ce(Imp)-Silicalite1-HIE | ∞                  | 475                                                                | 196                                                                | 279                                                                  | 0.877                                                                 | 0.112                                                                 | 0.765                                                               |

<sup>a</sup> Si/Al determined by wavelength dispersive x-ray fluorescence.

<sup>b</sup> S<sub>BET</sub>: Specific surface area (m<sup>2</sup>g<sup>-1</sup>) determined by BET method.

<sup>c</sup> S<sub>ext</sub>: External surface area (m<sup>2</sup>g<sup>-1</sup>).

<sup>d</sup> S<sub>micro</sub>: micropore surface area (m<sup>2</sup>g<sup>-1</sup>), determined by t-plot method.

<sup>e</sup> V<sub>total</sub>: total pore volume (cm<sup>3</sup>g<sup>-1</sup>) obtained at P/P<sub>0</sub>=0.99.

<sup>f</sup> V<sub>micro</sub>: micropore volume (cm<sup>3</sup>g<sup>-1</sup>), determined by t-plot method.

<sup>g</sup> V<sub>ext</sub>: external pore volume (cm<sup>3</sup>g<sup>-1</sup>), V<sub>ext</sub>=V<sub>total</sub>-V<sub>micro</sub>.

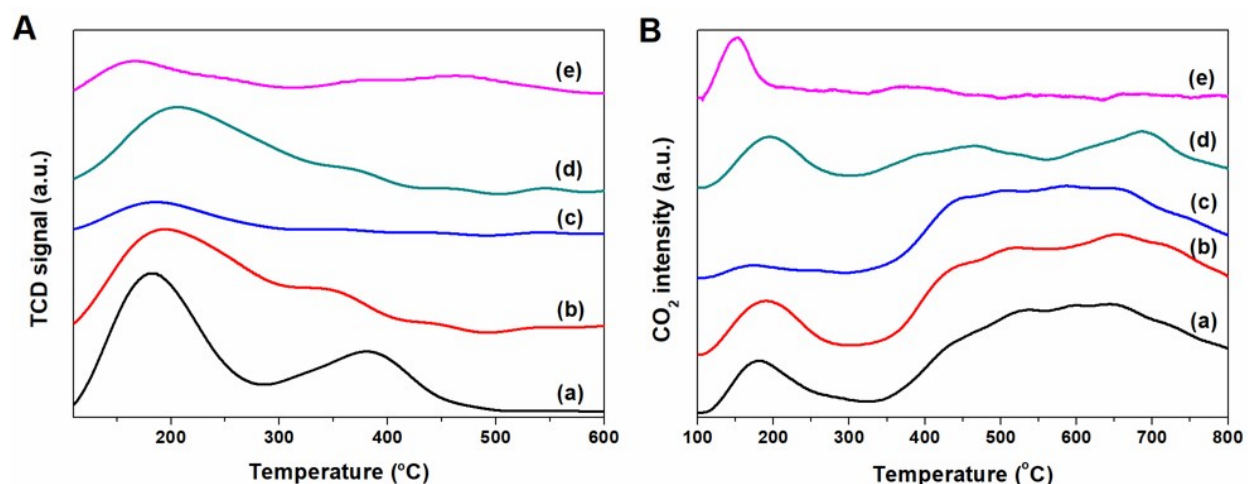

**Fig. S8** Chemisorption profiles of (A) NH<sub>3</sub> TPD and (B) CO<sub>2</sub> TPD for (a) 5Ce(Exc)-ZSM5-HIE, (b) 5Ce(Imp)-ZSM5-HIE, (c) 5Ce(Imp)-Silicalite1-HIE, (d) 5Ce(Exc)-ZSM5-CON, and (e) commercial CeO<sub>2</sub> nanoparticles.

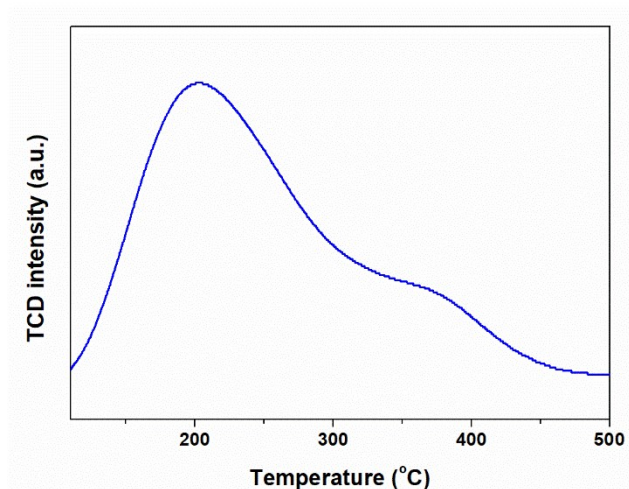

**Fig. S9** Chemisorption profiles of NH<sub>3</sub> TPD for ZSM5-HIE.

**Table S4** Acid density of all the prepared catalysts obtained from NH<sub>3</sub>-TPD measurement.

| Catalysts                | Acidity amount (μmol g <sup>-1</sup> ) |                    | Total acid density (μmol g <sup>-1</sup> ) |
|--------------------------|----------------------------------------|--------------------|--------------------------------------------|
|                          | Weak (180-200°C)                       | Strong (350-400°C) |                                            |
| ZSM5-HIE                 | 79                                     | 34                 | 113                                        |
| 5Ce(Imp)-ZSM5-HIE        | 73                                     | 39                 | 112                                        |
| 5Ce(Imp)-Silicalite1-HIE | 24                                     | 4                  | 28                                         |
| 5Ce(Exc)-ZSM5-HIE        | 95                                     | 57                 | 152                                        |
| 5Ce(Exc)-ZSM5-CON        | 71                                     | 21                 | 92                                         |
| CeO <sub>2</sub>         | 23                                     | 12                 | 45                                         |

**Table S5** Basic density of all the prepared catalysts obtained from CO<sub>2</sub>-TPD measurement.

| Catalysts                | Basicity amount ( $\mu\text{mol g}^{-1}$ ) |                      |                    | Total basic density ( $\mu\text{mol g}^{-1}$ ) |
|--------------------------|--------------------------------------------|----------------------|--------------------|------------------------------------------------|
|                          | Weak (150-200°C)                           | Moderate (450-500°C) | Strong (600-700°C) |                                                |
| 5Ce(Imp)-ZSM5-HIE        | 37                                         | 101                  | 247                | 385                                            |
| 5Ce(Imp)-Silicalite1-HIE | 8                                          | 95                   | 171                | 273                                            |
| 5Ce(Exc)-ZSM5-HIE        | 35                                         | 146                  | 169                | 350                                            |
| 5Ce(Exc)-ZSM5-CON        | 33                                         | 60                   | 77                 | 170                                            |
| CeO <sub>2</sub>         | 21                                         | 19                   | 2                  | 42                                             |

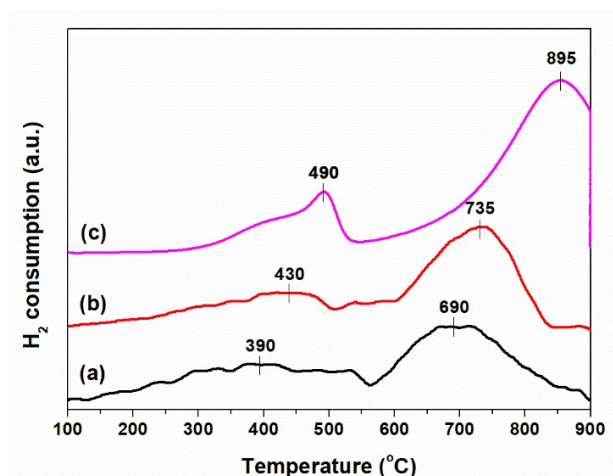**Fig. S10** Chemisorption profiles of H<sub>2</sub> TPR for (a) 5Ce(Exc)-ZSM5-HIE), (b) 5Ce(Imp)-ZSM5-HIE and (c) commercial CeO<sub>2</sub> nanoparticles.**Table S6** Reducibility of all the prepared catalysts obtained from H<sub>2</sub>-TPR measurement.

| Catalysts         | H <sub>2</sub> consumption ( $\text{mmol g}^{-1}$ ) |       | Total H <sub>2</sub> consumption ( $\text{mmol g}^{-1}$ ) |
|-------------------|-----------------------------------------------------|-------|-----------------------------------------------------------|
|                   | Surface oxygen                                      | bulk  |                                                           |
| 5Ce(Imp)-ZSM5-HIE | 0.002                                               | 0.003 | 0.005                                                     |
| 5Ce(Exc)-ZSM5-HIE | 0.002                                               | 0.003 | 0.005                                                     |
| CeO <sub>2</sub>  | 0.002                                               | 0.007 | 0.009                                                     |



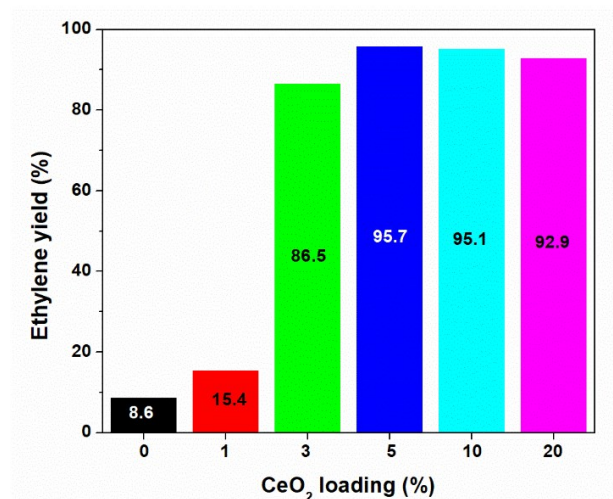

**Fig. S11** Catalytic activity in term of ethylene yield over different CeO<sub>2</sub> loading on ZSM5-HIE prepared by ion-exchange method: Reaction condition at 350°C after 12h of reaction time.

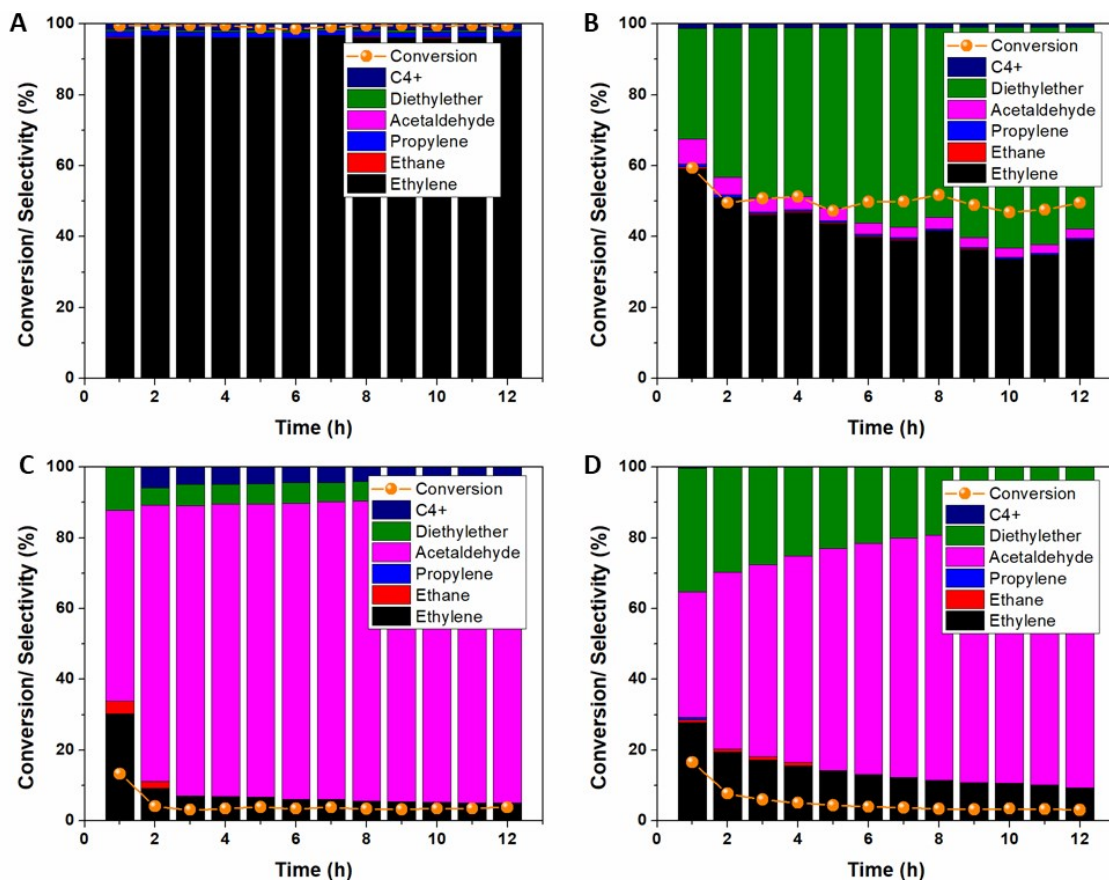

**Fig. S12** Catalytic performance in term of ethanol conversion and product selectivity of (A) 5Ce(Exc)-ZSM5-HIE, (B) 5Ce(Imp)-ZSM5-HIE, (C) 5Ce(Imp)-Silicalite1-HIE and (D) 5Ce(Exc)-ZSM5-CON.



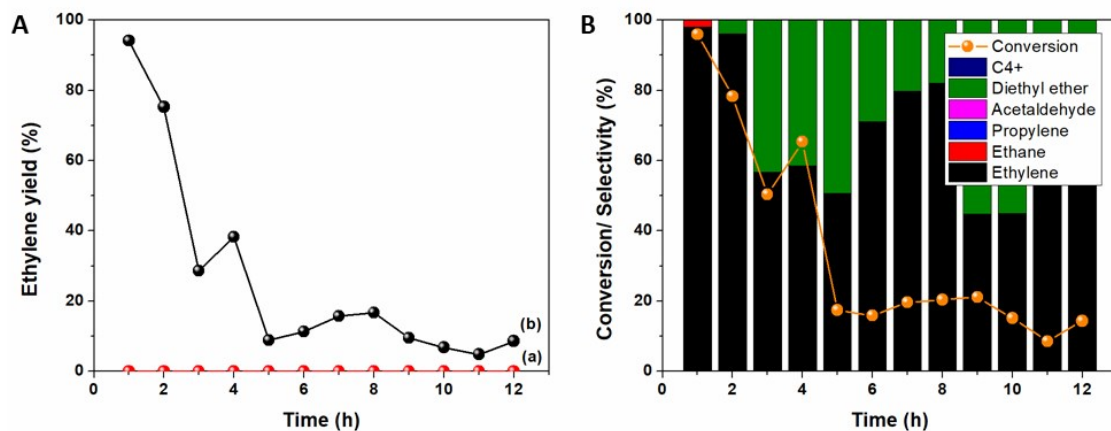

**Fig. S13** Catalytic performance in term of ethanol conversion and product selectivity over hierarchical zeolites: (A) Catalytic activity of (a) Silicalite1-HIE and (b) ZSM5-HIE and (B) Product distribution over ZSM5-HIE.

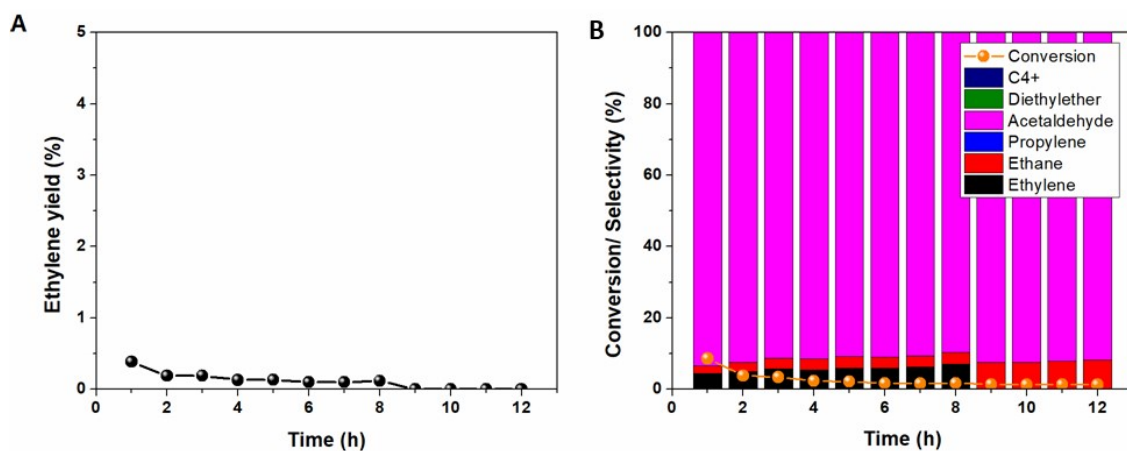

**Fig. S14** Catalytic performance in term of ethanol conversion and product selectivity of commercial  $\text{CeO}_2$  nanoparticles: (A) Catalytic activity, and (B) Product distribution.

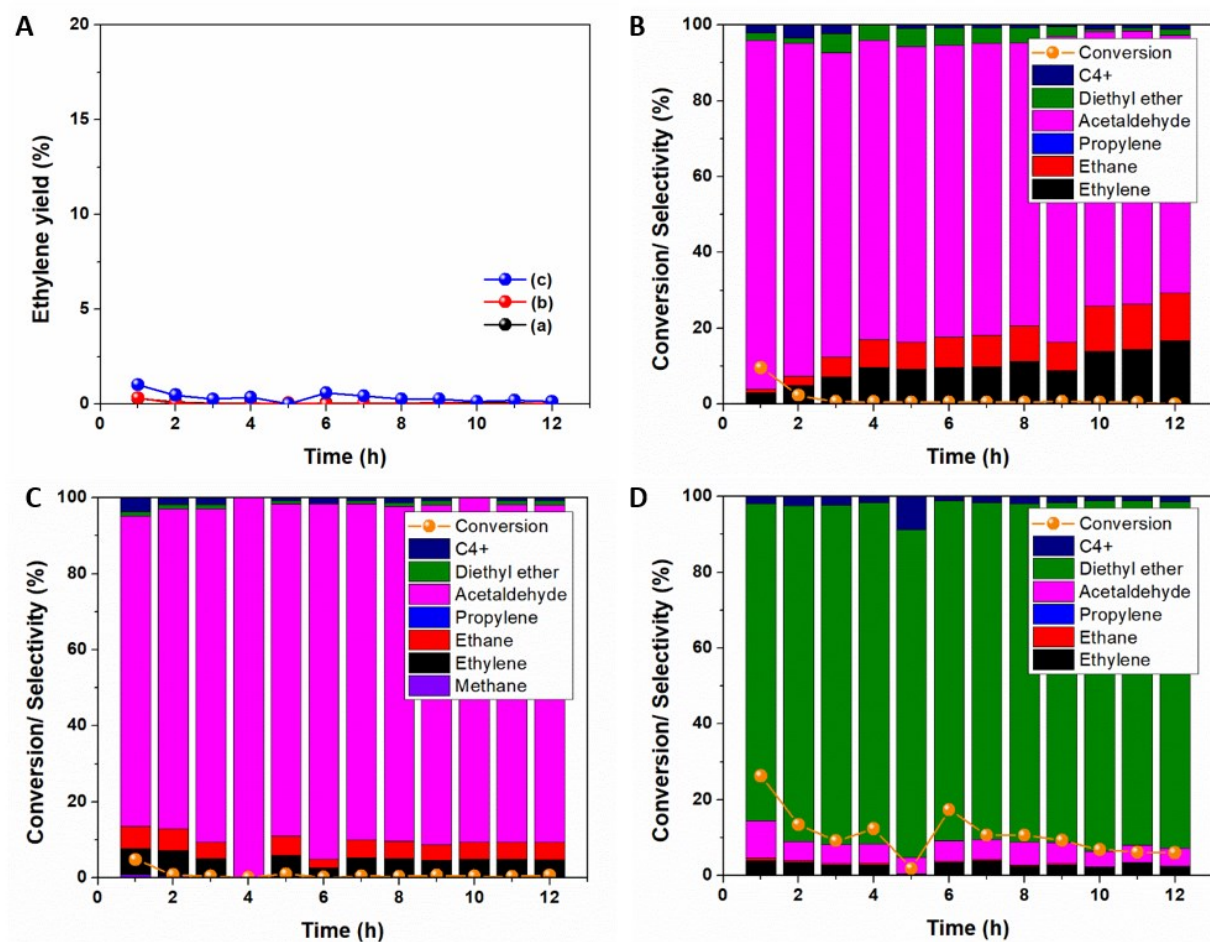

**Fig. S15** Catalytic performance in term of ethanol conversion and product selectivity: (A) Catalytic activity of (a) 5Ce(Imp)-ZSM5-CON, (b) 5Ce(Imp)-SiO<sub>2</sub> and (c) 5Ce(Imp)-Al<sub>2</sub>O<sub>3</sub> and product distribution of (B) 5Ce(Imp)-ZSM5-CON, (C) 5Ce(Imp)-SiO<sub>2</sub> and (D) 5Ce(Imp)-Al<sub>2</sub>O<sub>3</sub>.
